# Supplementary material for: Species-Specific N-Glycomes and Methylation Patterns of Oysters Crassostrea gigas and Ostrea edulis and Their Possible Consequences for the Norovirus–HBGA Interaction
Source: MDPI journal article supplement (doi:10.3390/md21060342), 2023-06-02
Supplement: s1 [file s1]

**Species-Specific *N*-Glycomes and Methylation  
Patterns of Oysters *Crassostrea gigas* and *Ostrea edulis*  
and Their Possible Consequences for the  
Norovirus–HBGA Interaction**

**Figure S1.** Monosaccharide composition analysis of *N*-glycans. Total Ion Count generated from GC-MS analysis of reduced and permethylated derivatives of (A) authentic standards, (B) *N*-glycans released from the mantle of *C. gigas* by PNGase F, (C) *N*-glycans released from the mantle of *O. edulis* by PNGase F.

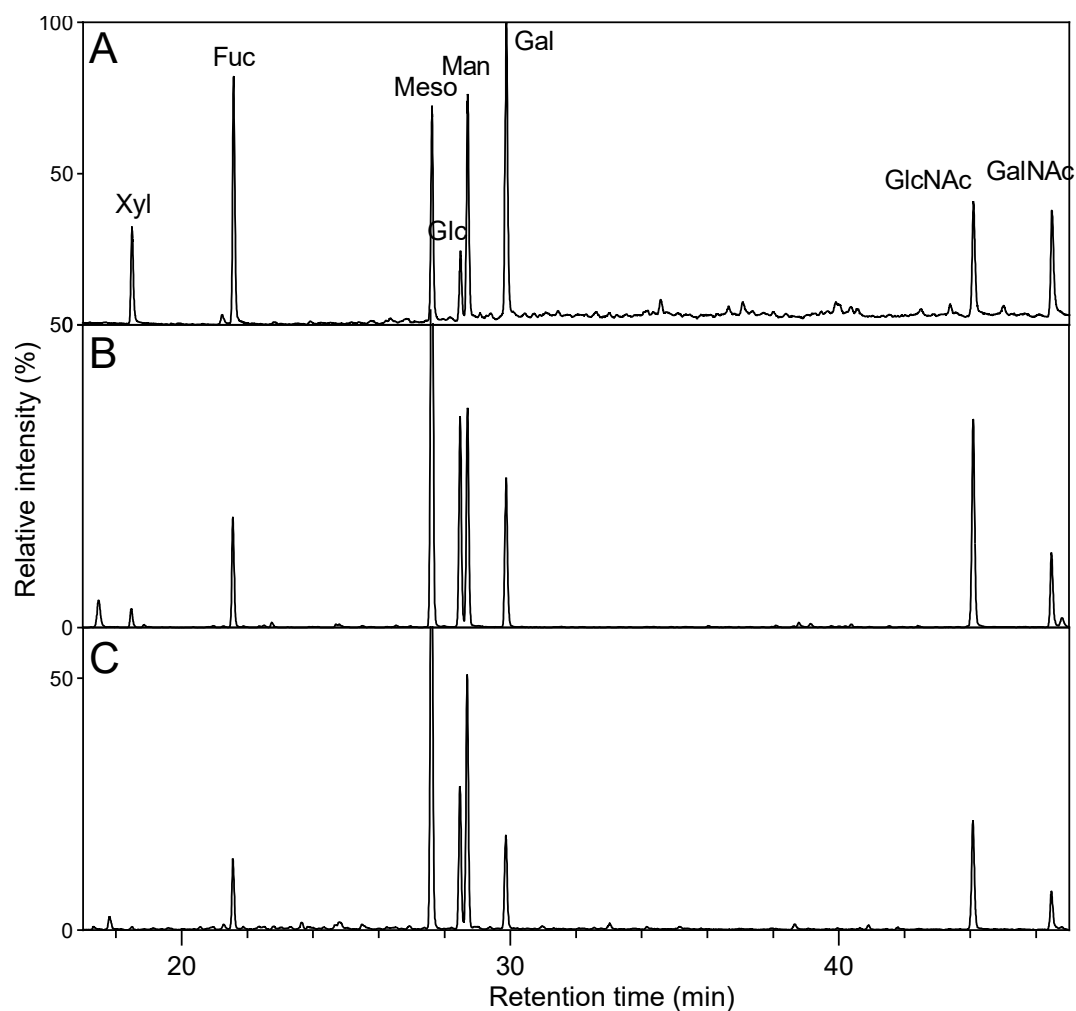

**Figure S2.** Ratios (in %) of Me-3O-Man (light green) and Me-4O-Man (dark green) in *N*-glycans isolated from individual tissues of *C. gigas* and *O. edulis* (G, gills; D, digestive tissue; M, mantle) using (A) PNGase F and (B) PNGase A.

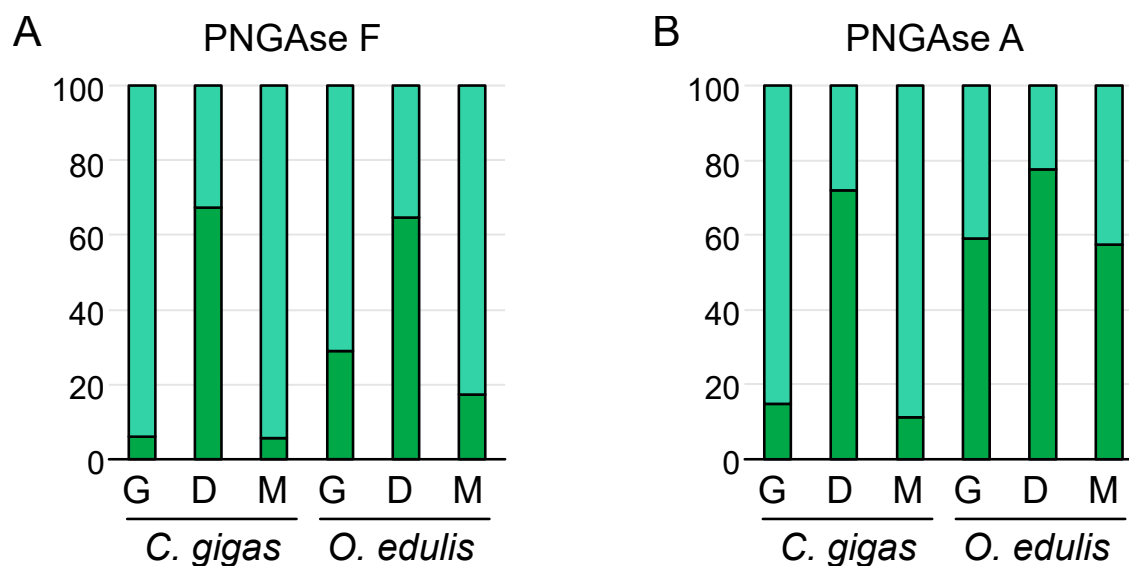

**Table S1.** Quantification of monosaccharides in *N*-glycans sequentially released by PNGase A and F of **(A)** *Crassostrea gigas* (Cg) and **(B)** *Ostrea edulis* (Oe) in the three analysed organs gills (G), digestive track (D) and mantle (M). Values are expressed in ng of monosaccharides per mg of proteins.

**A**

|          | PNGase F |       |       | PNGase A |       |       | Total PNGase A + F |
|----------|----------|-------|-------|----------|-------|-------|--------------------|
|          | Gg-G     | Cg-D  | Cg-M  | Cg-G     | Cg-D  | Cg-M  |                    |
| MeFuc    | 27,8     | 28,7  | 20,0  | 0,5      | 6,5   | 3,6   | 87,0               |
| Fuc      | 37,4     | 115,5 | 71,2  | 12,9     | 52,3  | 36,2  | 325,6              |
| Xyl      | 3,1      | 15,1  | 13,1  | 3,4      | 2,9   | 7,8   | 45,5               |
| MeMan    | 5,0      | 78,7  | 33,9  | 0,7      | 15,6  | 10,7  | 144,6              |
| MeGal    | 1,0      | 1,3   | 0,6   | 0,0      | 0,6   | 0,3   | 3,8                |
| Man      | 20,2     | 227,1 | 105,7 | 3,5      | 28,9  | 25,2  | 410,5              |
| Gal      | 36,5     | 64,1  | 47,5  | 10,9     | 15,3  | 14,5  | 188,7              |
| MeGalNAc | 6,1      | 14,2  | 15,9  | 0,8      | 1,5   | 3,6   | 42,2               |
| GlcNAc   | 18,8     | 141,8 | 71,7  | 2,9      | 26,1  | 21,6  | 282,9              |
| GalNAc   | 5,4      | 6,8   | 4,2   | 0,6      | 1,0   | 0,9   | 19,0               |
| Total    | 161,2    | 693,2 | 383,8 | 36,3     | 150,8 | 124,5 | 1549,8             |

**B**

|          | PNGase F |        |        | PNGase A |       |       | Total PNGase A + F |
|----------|----------|--------|--------|----------|-------|-------|--------------------|
|          | Oe-G     | Oe-D   | Oe-M   | Oe-G     | Oe-D  | Oe-M  |                    |
| MeFuc    | 162,0    | 71,6   | 133,7  | 15,7     | 5,9   | 18,6  | 407,6              |
| Fuc      | 313,2    | 221,6  | 256,3  | 62,1     | 36,2  | 53,2  | 942,6              |
| Xyl      | 4,8      | 5,0    | 6,7    | 4,2      | 2,9   | 3,6   | 27,2               |
| MeMan    | 194,3    | 113,8  | 196,6  | 25,8     | 10,2  | 18,3  | 558,9              |
| MeGal    | 28,4     | 12,5   | 10,7   | 4,4      | 2,2   | 5,0   | 63,3               |
| Man      | 510,9    | 365,1  | 494,6  | 46,1     | 21,2  | 38,0  | 1475,9             |
| Gal      | 253,8    | 150,6  | 166,9  | 29,6     | 23,2  | 36,4  | 660,4              |
| MeGalNAc | 70,7     | 25,3   | 70,6   | 5,0      | 2,5   | 8,5   | 182,7              |
| GlcNAc   | 346,6    | 212,8  | 366,9  | 44,5     | 20,8  | 46,6  | 1038,1             |
| GalNAc   | 31,0     | 12,9   | 20,7   | 2,1      | 2,0   | 4,5   | 73,2               |
| Total    | 1915,7   | 1191,1 | 1723,9 | 239,4    | 127,1 | 232,7 | 5429,9             |

**Table S2.** List of *N*-glycans identified as permethylated derivatives following sequential released by PNGases F and PNGase A from three tissues gills (G), digestive tract (D) and mantle (M) of two oyster species, *Crassostrea gigas* (CG) and *Ostrea edulis* (OE). Structures were deduced from MS and MS<sup>n</sup> analyses of permethyl derivatives. *N*-glycans are ordered in increasing molecular weight. The presence of different *N*-glycans in each organ is indicated by a blue rectangle for *Crassostrea gigas* and green for *Ostrea edulis*, irrespective of the presence of natural methyl groups. Structures were represented according the standard Symbol Nomenclature for Glycan system [1].

| name       | Theoretical m/z | Structure | <i>C.gigas</i> |   |   | <i>O.edulis</i> |   |   |
|------------|-----------------|-----------|----------------|---|---|-----------------|---|---|
|            |                 |           | G              | D | M | G               | D | M |
| CG1, OE1   | 1141,57         |           |                |   |   |                 |   |   |
| CG2, OE2   | 1141,57         |           |                |   |   |                 |   |   |
| CG3, OE3   | 1171,58         |           |                |   |   |                 |   |   |
| CG4        | 1301,65         |           |                |   |   |                 |   |   |
| CG5, OE4   | 1301,65         |           |                |   |   |                 |   |   |
| CG6, OE5   | 1315,66         |           |                |   |   |                 |   |   |
| CG7, OE6   | 1331,66         |           |                |   |   |                 |   |   |
| OE7        | 1331,66         |           |                |   |   |                 |   |   |
| CG8, OE8   | 1345,67         |           |                |   |   |                 |   |   |
| CG9, OE9   | 1345,67         |           |                |   |   |                 |   |   |
| CG10       | 1345,67         |           |                |   |   |                 |   |   |
| OE10       | 1345,67         |           |                |   |   |                 |   |   |
| CG11, OE11 | 1375,68         |           |                |   |   |                 |   |   |
| OE12       | 1375,68         |           |                |   |   |                 |   |   |
| OE13       | 1375,68         |           |                |   |   |                 |   |   |
| CG12       | 1416,71         |           |                |   |   |                 |   |   |



|            |         |  |  |  |  |
|------------|---------|--|--|--|--|
| CG27       | 1620,81 |  |  |  |  |
| CG28, OE25 | 1679,84 |  |  |  |  |
| CG29       | 1709,85 |  |  |  |  |
| CG30       | 1709,85 |  |  |  |  |
| CG31       | 1723,86 |  |  |  |  |
| CG32       | 1723,86 |  |  |  |  |
| CG33       | 1750,87 |  |  |  |  |
| CG34       | 1750,87 |  |  |  |  |
| CG35, OE26 | 1753,87 |  |  |  |  |
| CG36       | 1764,89 |  |  |  |  |
| CG37       | 1780,88 |  |  |  |  |
| CG38, OE27 | 1783,88 |  |  |  |  |
| CG39       | 1794,9  |  |  |  |  |
| CG40       | 1794,9  |  |  |  |  |
| OE28       | 1794,9  |  |  |  |  |



|            |         |                                                                                     |  |  |  |
|------------|---------|-------------------------------------------------------------------------------------|--|--|--|
| OE29       | 1794,9  |    |  |  |  |
| OE30       | 1794,9  |    |  |  |  |
| CG41       | 1824,91 |    |  |  |  |
| CG42       | 1913,95 |    |  |  |  |
| CG43       | 1924,96 |    |  |  |  |
| CG44       | 1954,97 |    |  |  |  |
| CG45       | 1954,97 |  |  |  |  |
| CG46       | 1968,99 |  |  |  |  |
| OE31       | 1968,99 |  |  |  |  |
| CG47, OE32 | 1987,98 |  |  |  |  |
| CG48, OE33 | 2040,02 |  |  |  |  |
| CG49       | 2070,03 |  |  |  |  |
| CG50       | 2118,05 |  |  |  |  |



|            |         |                                                                                     |  |  |  |
|------------|---------|-------------------------------------------------------------------------------------|--|--|--|
| CG58       | 2244,12 | 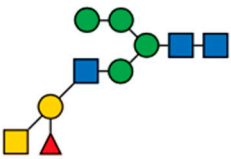   |  |  |  |
| OE41       | 2244,12 |    |  |  |  |
| CG59       | 2285,15 |    |  |  |  |
| OE42       | 2347,18 |    |  |  |  |
| CG60       | 2374,19 |   |  |  |  |
| OE43       | 2377,19 |  |  |  |  |
| CG61, OE44 | 2388,2  |  |  |  |  |
| CG62, OE45 | 2388,2  |  |  |  |  |
| CG63, OE46 | 2396,18 |  |  |  |  |
| CG64       | 2404,2  |  |  |  |  |

|            |         |                                                                                     |  |  |  |
|------------|---------|-------------------------------------------------------------------------------------|--|--|--|
| CG65, OE47 | 2418,21 | 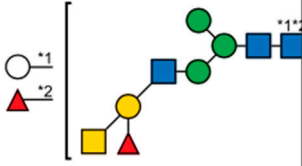   |  |  |  |
| CG66       | 2418,21 |    |  |  |  |
| CG67       | 2445,22 |    |  |  |  |
| CG68       | 2459,24 |    |  |  |  |
| CG69       | 2489,25 |   |  |  |  |
| CG70       | 2548,28 |  |  |  |  |
| CG71, OE48 | 2548,28 |  |  |  |  |
| CG72, OE49 | 2562,29 |  |  |  |  |
| CG73       | 2578,29 |  |  |  |  |
| CG74, OE50 | 2600,3  |  |  |  |  |



|            |         |                                                                                     |  |  |  |  |
|------------|---------|-------------------------------------------------------------------------------------|--|--|--|--|
| CG83       | 3098,55 | 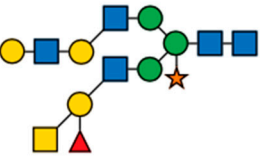   |  |  |  |  |
| OE55       | 3112,57 |    |  |  |  |  |
| CG84       | 3242,63 |    |  |  |  |  |
| CG85, OE56 | 3256,64 |   |  |  |  |  |
| OE57       | 3286,66 |  |  |  |  |  |
| CG86       | 3416,72 |  |  |  |  |  |
| CG87, OE58 | 3430,73 |  |  |  |  |  |
| CG88       | 3590,81 |  |  |  |  |  |

|      |      |                                                                                   |                                                                                     |
|------|------|-----------------------------------------------------------------------------------|-------------------------------------------------------------------------------------|
| OE59 | 3951 | 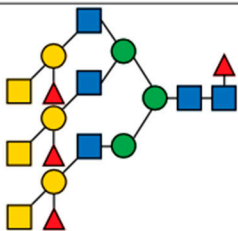 |  |
|------|------|-----------------------------------------------------------------------------------|-------------------------------------------------------------------------------------|

**Table S3.** List of methylated N-glycans identified from the mantle of *Crassostrea gigas* and *Ostrea edulis*. Following their sequential release from *C.gigas* and *O.edulis* by PNGase F and A, N-glycans were deuteromethylated and analysed by MALDI-QIT-TOF. Each -3 m.u. difference between the expected mass and the measured mass indicated the presence of a methyl group in the native N-glycan. The number of methyl groups per N-glycan is indicated by the presence of a cross in the corresponding column of the table (yellow for *c.gigas* and blue for *O.edulis*).

| N-glycan | 0 | 1 | 2 | 3 |
|----------|---|---|---|---|
| CG1      |   | x |   |   |
| CG2      | x | x |   |   |
| CG3      | x | x | x |   |
| CG4      |   | x |   |   |
| CG5      |   | x |   |   |
| CG6      | x | x |   |   |
| CG7      | x | x | x |   |
| CG8      |   | x | x |   |
| CG9      | x | x | x |   |
| CG10     | x | x |   |   |
| CG11     | x | x | x |   |
| CG12     |   | x |   |   |
| CG13     |   | x |   |   |
| CG14     | x | x | x |   |
| CG15     |   | x | x |   |
| CG16     |   | x |   |   |
| CG17     | x | x | x |   |
| CG18     |   | x | x |   |
| CG19     |   |   | x |   |
| CG20     |   |   | x |   |

| N-glycan | 0 | 1 | 2 | 3 |
|----------|---|---|---|---|
| CG21     | x | x | x |   |
| CG22     | x | x | x |   |
| CG24     | x | x | x | x |
| CG25     | x | x |   |   |
| CG27     | x | x | x |   |
| CG28     |   | x | x |   |
| CG33     | x | x |   |   |
| CG35     |   |   | x |   |
| CG37     | x | x |   |   |
| CG38     | x | x | x | x |
| CG39     | x | x |   |   |
| CG44     | x | x |   |   |
| CG45     | x | x |   |   |
| CG46     | x |   |   |   |
| CG47     | x | x | x | x |
| CG48     |   |   | x |   |
| CG49     |   |   | x |   |
| CG51     | x |   |   |   |
| CG52     | x |   | x | x |
| CG53     |   | x | x |   |

| N-glycan | 0 | 1 | 2 | 3 |
|----------|---|---|---|---|
| CG54     |   |   | x |   |
| CG55     |   |   | x |   |
| CG56     |   |   | x |   |
| CG60     |   | x | x |   |
| CG61     |   |   |   | x |
| CG62     |   |   | x | x |
| CG63     | x | x | x |   |
| CG69     |   | x |   |   |
| CG70     |   |   | x | x |
| CG71     |   | x | x |   |
| CG74     | x |   |   |   |
| CG77     |   |   | x | x |
| CG78     |   |   | x | x |

| N-glycan | 0 | 1 | 2 | 3 | 4 |
|----------|---|---|---|---|---|
| OE1      |   | x |   |   |   |
| OE2      | x | x |   |   |   |
| OE3      |   | x | x |   |   |
| OE5      |   | x |   |   |   |
| OE6      |   |   | x |   |   |
| OE8      |   |   | x |   |   |
| OE9      |   | x | x |   |   |
| OE10     | x | x |   |   |   |
| OE11     |   | x | x |   |   |
| OE12     |   | x |   |   |   |
| OE13     |   | x |   |   |   |
| OE14     |   | x |   |   |   |
| OE17     |   |   | x |   |   |
| OE21     |   |   | x |   |   |
| OE22     |   | x | x |   |   |
| OE23     |   | x | x |   |   |
| OE24     | x |   | x | x |   |
| OE26     |   |   | x |   |   |
| OE27     |   |   | x | x |   |
| OE29     |   |   | x |   |   |
| OE31     |   |   | x | x |   |
| OE33     |   | x | x |   |   |
| OE34     |   | x | x | x |   |
| OE35     |   |   |   | x |   |
| OE36     |   |   |   | x |   |
| OE41     | x |   | x |   |   |
| OE42     |   | x | x | x |   |
| OE52     |   |   |   | x | x |
| OE54     | x | x | x |   |   |
